# Supplementary material for: HAGE (DDX43) is a biomarker for poor prognosis and a predictor of chemotherapy response in breast cancer
Source: PubMed Central journal article supplement — Br J Cancer. 2014 Apr 22;110(10):2450–61. doi: 10.1038/bjc.2014.168 (PMC4021517; doi:10.1038/bjc.2014.168), 2014-04-22
Supplement: bjc2014168x1.pdf [file bjc2014168x1.pdf]

Custom-made rabbit anti-HAGE mono-specific polyclonal antibody

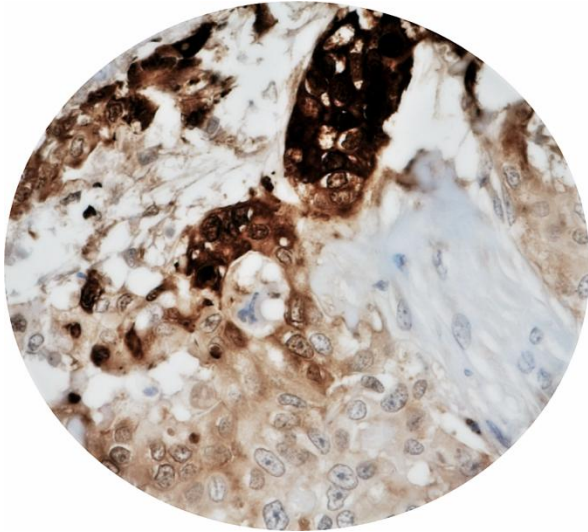

HAGE positive

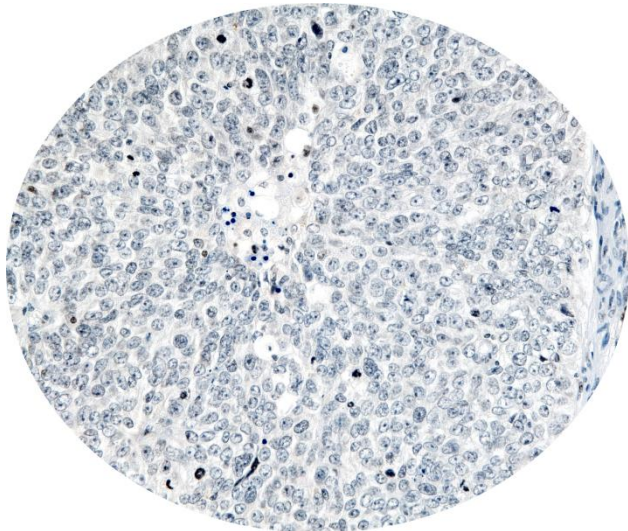

HAGE Negative

Anti-DDX43; HPA031381, Sigma-Aldrich

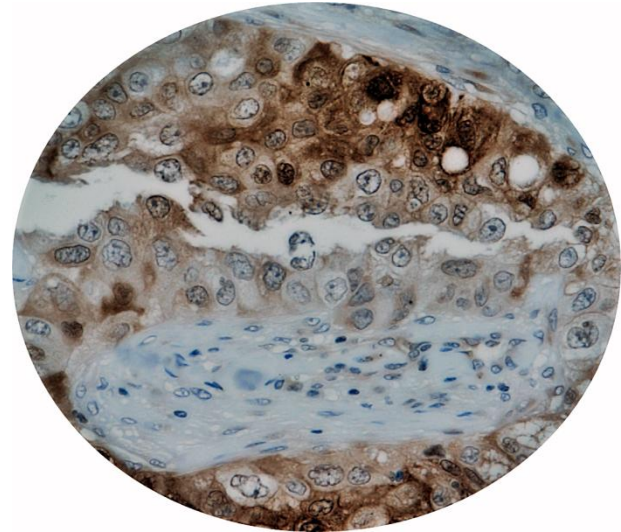

HAGE positive

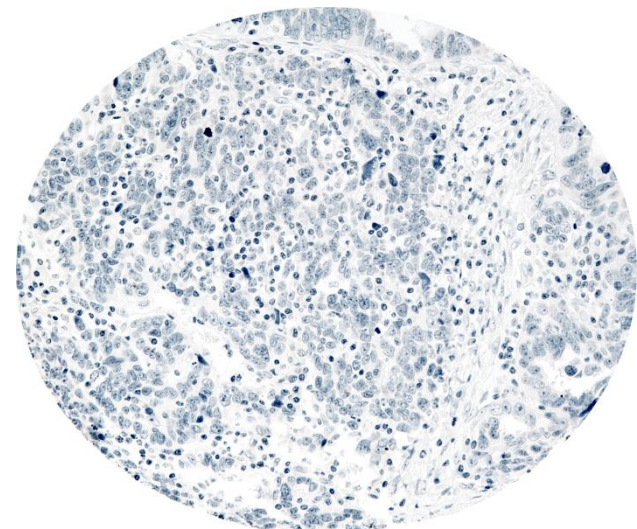

HAGE Negative
